# Supplementary material for: PTPN13 Participates in the Regulation of Epithelial–Mesenchymal Transition and Platinum Sensitivity in High-Grade Serous Ovarian Carcinoma Cells
Source: MDPI journal article supplement (doi:10.3390/ijms242015413), 2023-10-21
Supplement: s1 [file s1]

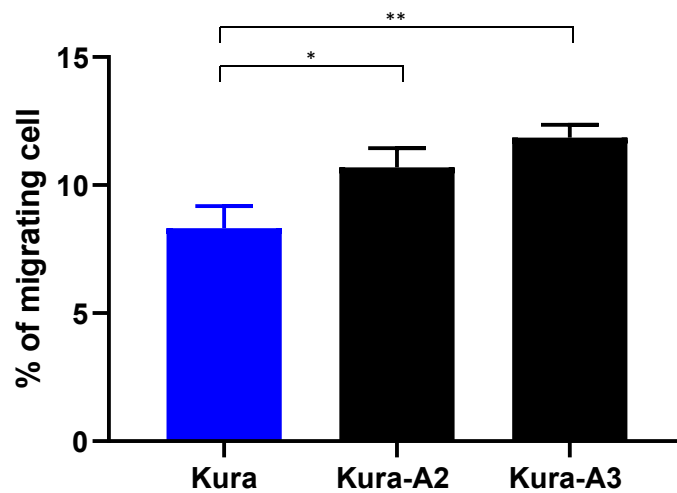

**Supplementary Figure S3. PTPN13 regulates KURAMOCHI cell invasiveness:** Invasiveness of KURAMOCHI cells (parental line and CRISPR/Cas9 clones; Kura-A2 and Kura-A3) was evaluated with Boyden chambers coated with 30 $\mu$ g Matrigel and quantified by the MTT assay [12]. Invasiveness was expressed as the percentage of cells migrating to the bottom chamber after 24h; mean  $\pm$  SD of 3 Boyden chambers. \*\*P < 0.01, \*P < 0.05 versus parental KURAMOCHI cells. t-test performed with Prism (GraphPad software) was used for comparing the means.
