# Supplementary material for: PTPN13 Participates in the Regulation of Epithelial–Mesenchymal Transition and Platinum Sensitivity in High-Grade Serous Ovarian Carcinoma Cells
Source: MDPI journal article supplement (doi:10.3390/ijms242015413), 2023-10-21
Supplement: s1 [file s1]

A

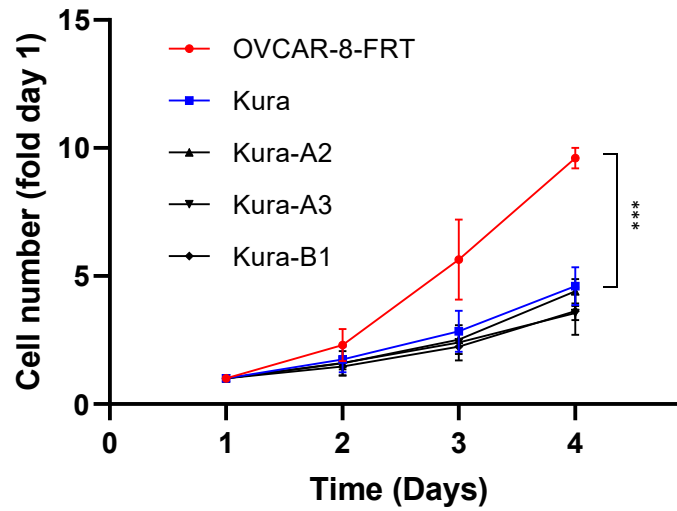

B

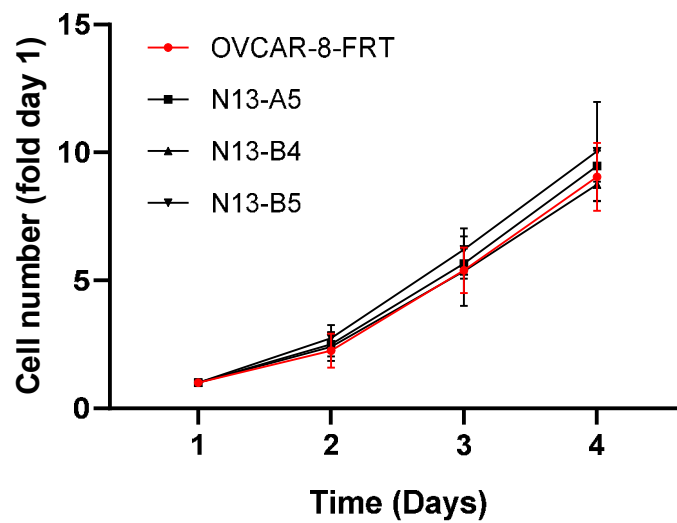

**Supplementary Figure S2: PTPN13 is not involved in HGSOC cell growth regulation.** Cell growth was measured using the MTS assay. Results are expressed as fold of Day 1 and are the mean  $\pm$  SD of three independent experiments. **A:** Comparison of cell growth in the parental KURAMOCHI cell line (Kura), in three clones where PTPN13 was knocked down/out with the CRISPR/Cas9 method (Kura-A2, Kura-A3 and Kura-B1), and in OVCAR-8-FRT cells. \*\*\* $P < 0.001$ , **B:** Comparison of cell growth in OVCAR-8-FRT cells and three isogenic clones (N13-A5, N13-B4 and N13-B5) that overexpress PTPN13.
