# Supplementary material for: PTPN13 Participates in the Regulation of Epithelial–Mesenchymal Transition and Platinum Sensitivity in High-Grade Serous Ovarian Carcinoma Cells
Source: MDPI journal article supplement (doi:10.3390/ijms242015413), 2023-10-21
Supplement: s1 [file s1]

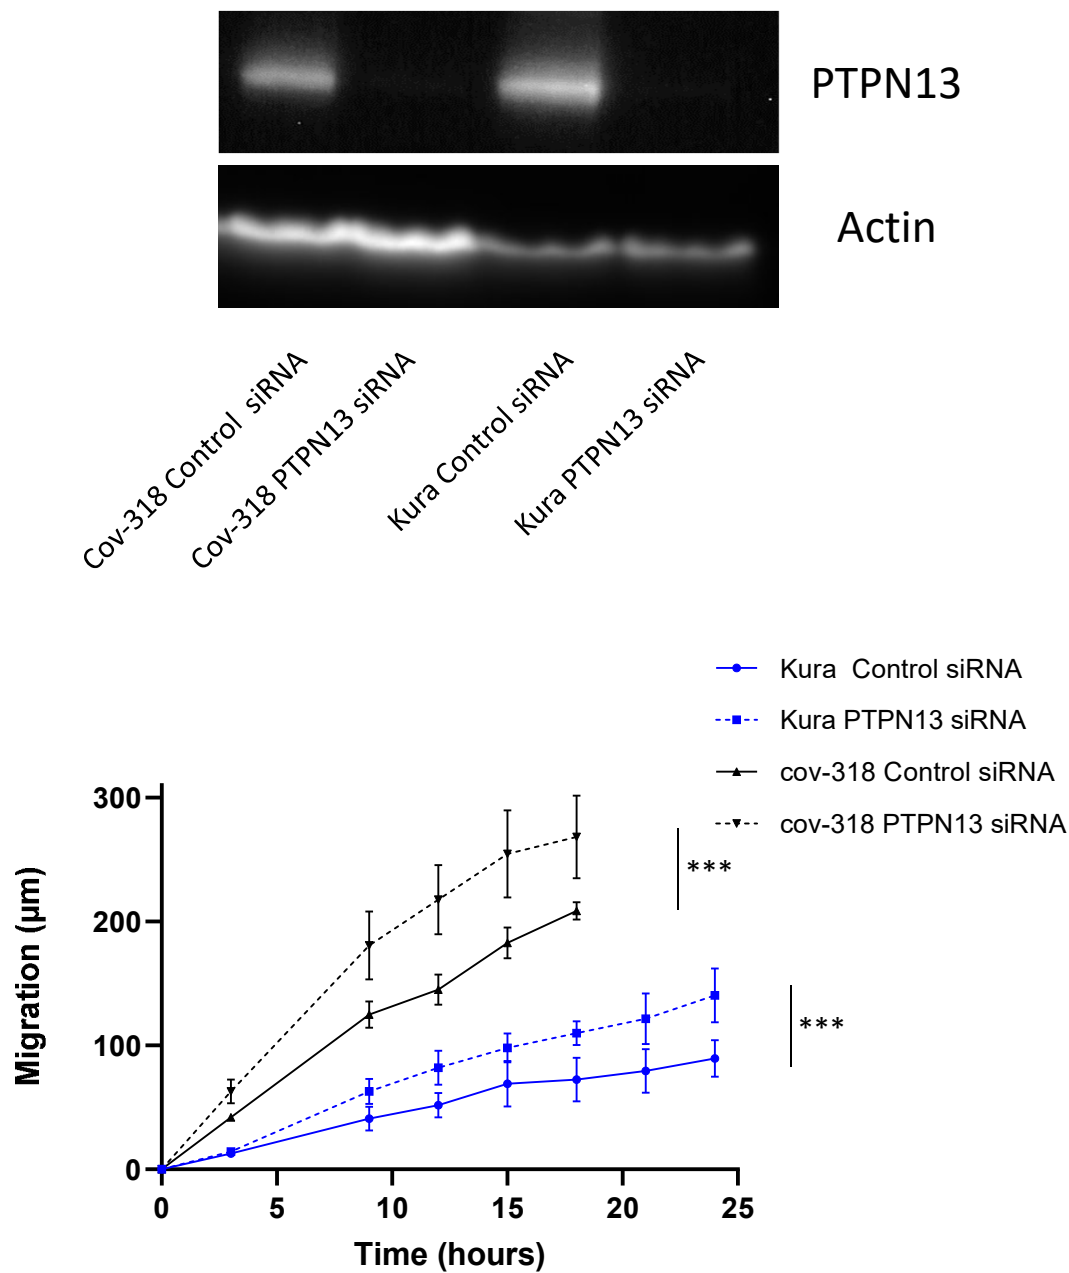

**Supplementary Figure S1.** Inhibition of PTPN13 expression by siRNA increases migration of HGSOC cell lines expressing high PTPN13 levels: Cov-318 and KURAMOCHI (Kura) cells were transfected with control siRNA (MWG) or siRNA against PTPN13 (CAGAUCAGCUUCCUGUAA) using Interferin (Polyplus). A: PTPN13 expression was monitored by western blotting using anti-PTPN13 antibodies. Equal loading was verified by re-probing with an anti-actin antibody. B: Directional migration of the indicated cell lines was assessed with the wound healing assay and monitored by video microscopy. Migration was expressed as the distance covered at each time point; mean  $\pm$  SD of 3 wells. \*\*\*P < 0.001. Two-way ANOVA performed with Prism (GraphPad software) was used for curve comparison.
