# Supplementary material for: PTPN13 Participates in the Regulation of Epithelial–Mesenchymal Transition and Platinum Sensitivity in High-Grade Serous Ovarian Carcinoma Cells
Source: MDPI journal article supplement (doi:10.3390/ijms242015413), 2023-10-21
Supplement: s1 [file s1]

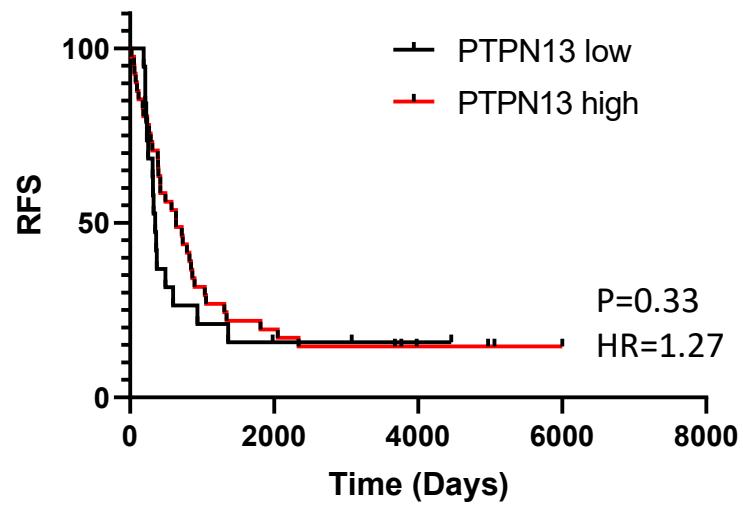

Supplementary Figure S4: Relapse-Free Survival in a cohort of patients (n=60) with HGSOC grouped according to *PTPN13* mRNA expression level assessed by RT-ddPCR.
